# Supplementary material
Source: Springer Nature journal article supplement (https://www.springermedizin.de/resource/supplementary/12889_2013_6115_MOESM1_ESM.pdf/9494472)
Supplement: MOESM1 [file 9494472]

## Participant Selection

- Malnourished frail persons
- Buddies

## Eligibility Screening

## Consent

## Randomization

### Intervention

- Malnourished frail persons (n=40)
- Buddies (n=40)

### Control

- Malnourished frail persons (n=40)
- Buddies (n=40)

## First assessment (AP1)

## 10-12 weeks assessment (AP2)

## 6 months follow up (AP3)

## 12 months follow up (AP4)
